# Supplementary material
Source: PubMed Central journal article supplement (PMC8192461)

# Version 1

1

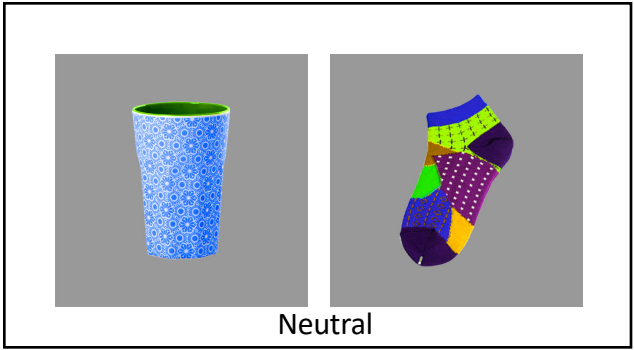

2

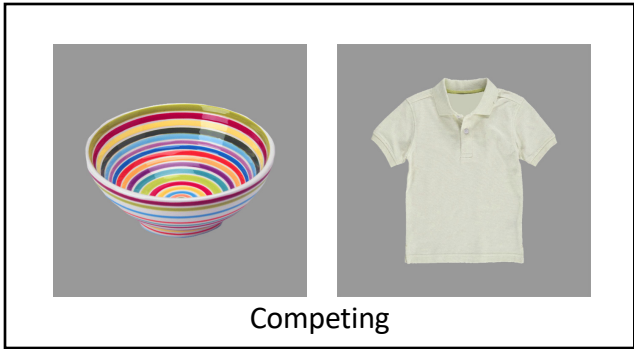

3

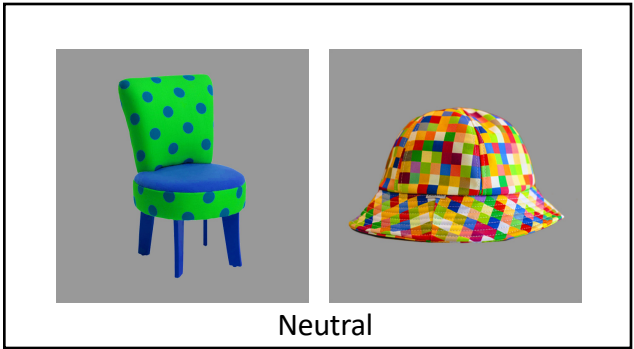

4

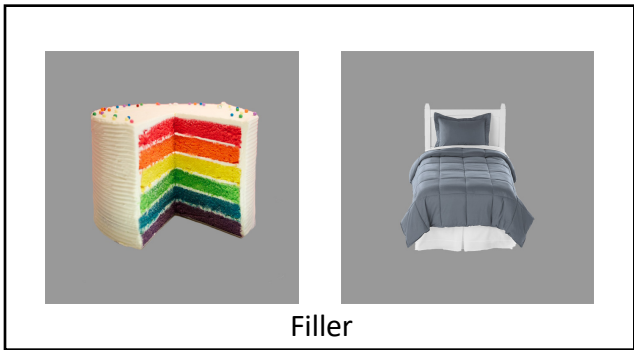

5

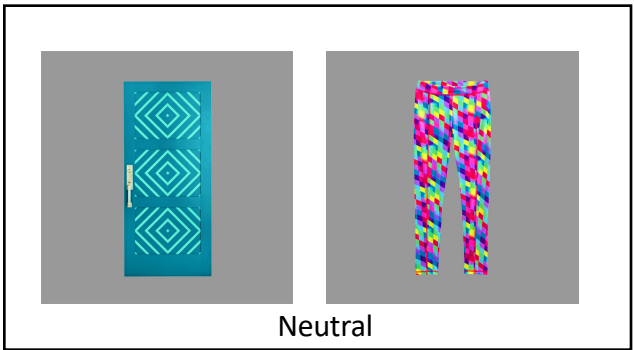

6

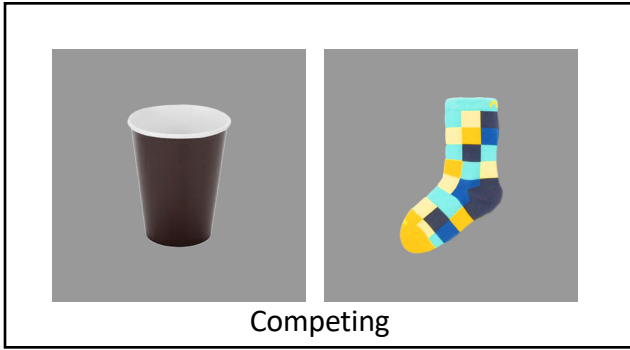

7

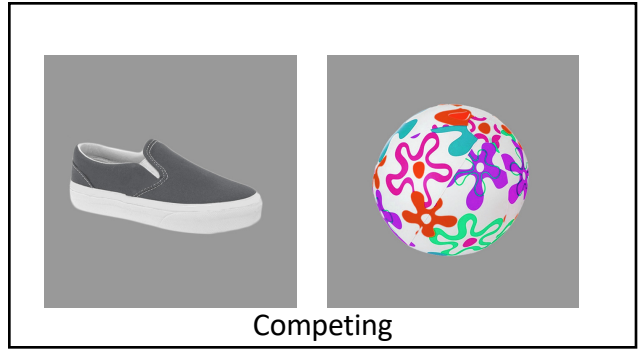

8

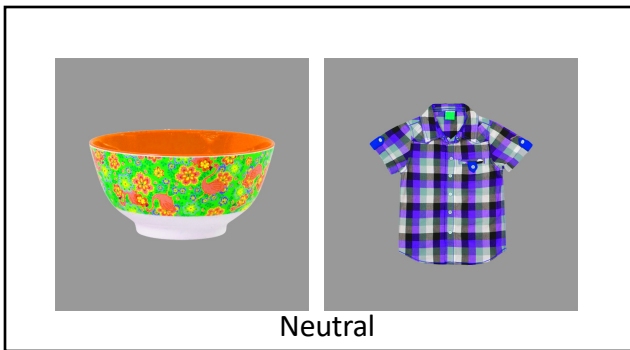

9

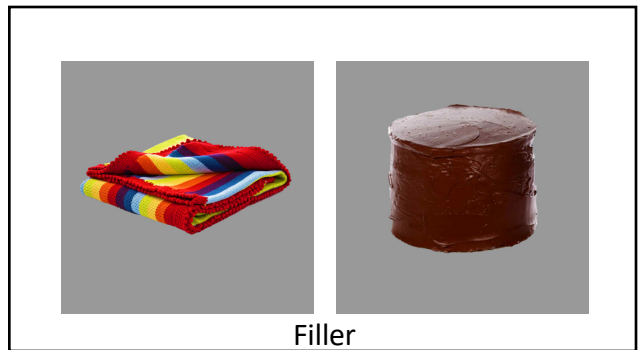

10

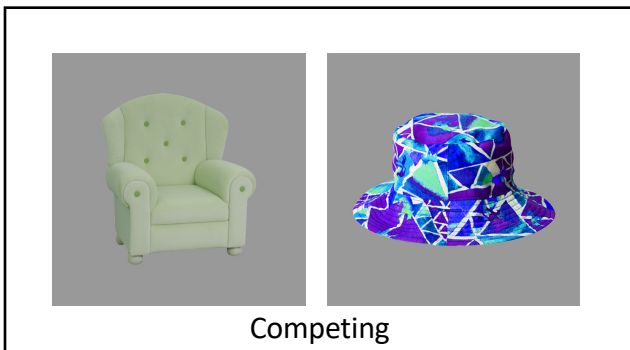

11

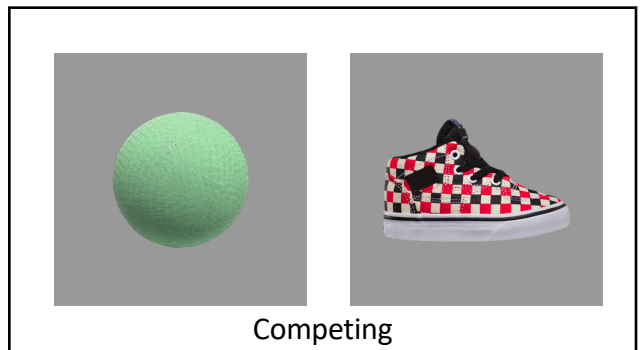

12

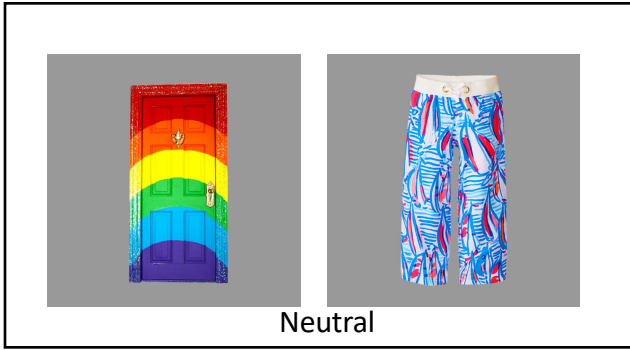

13

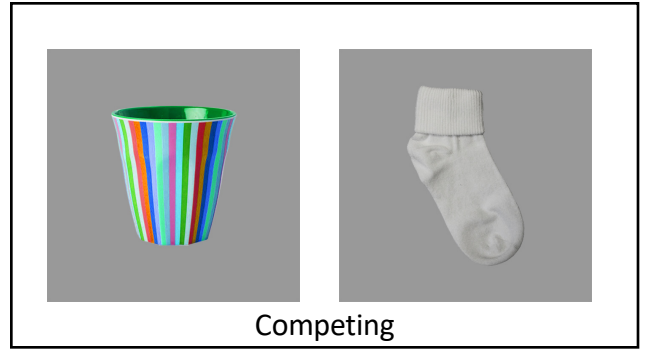

14

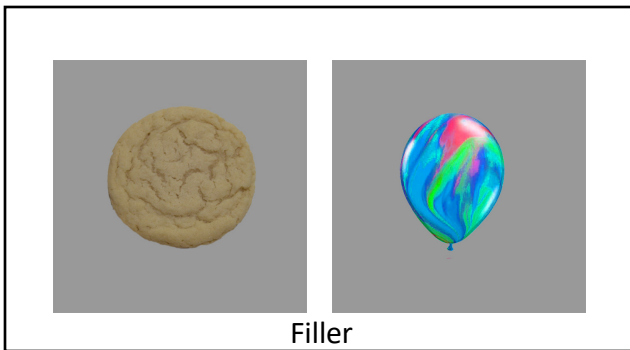

15

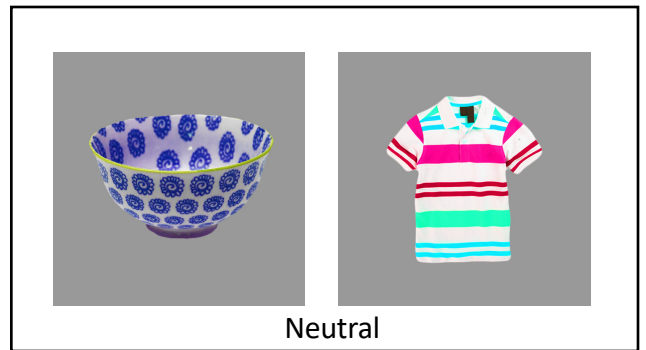

16

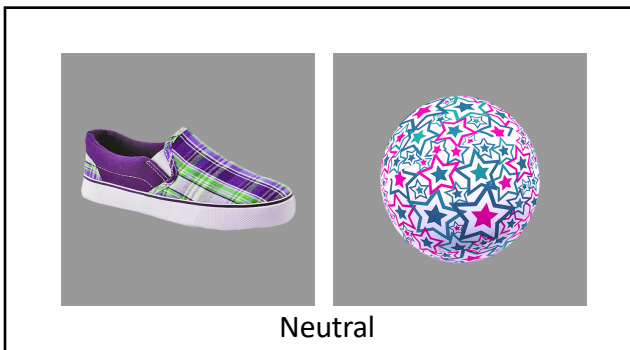

17

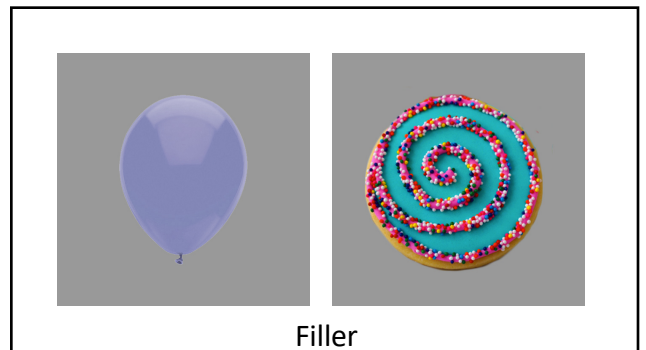

18

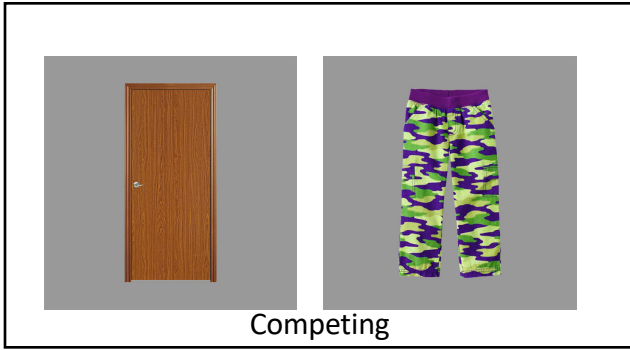

19

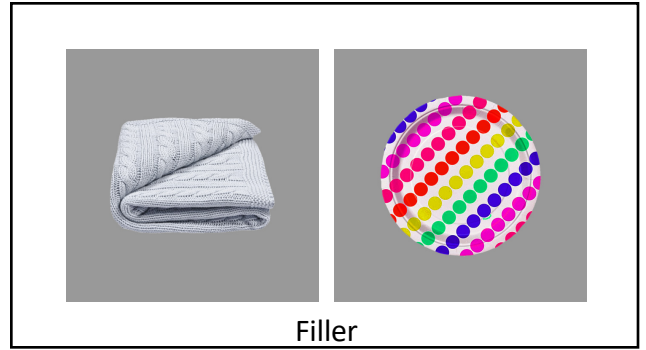

20

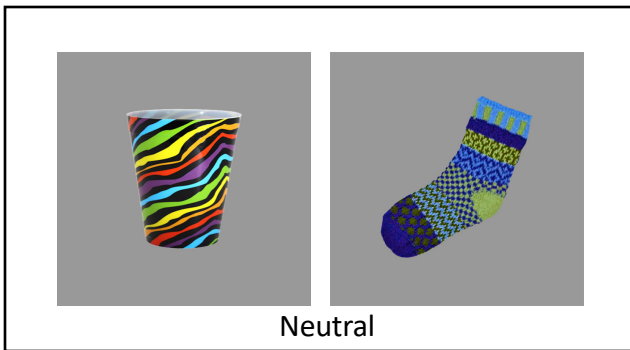

21

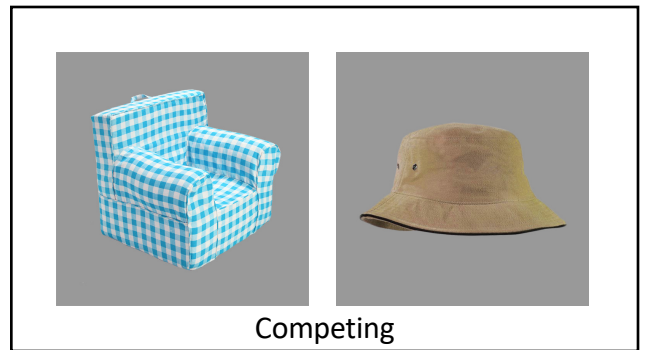

22

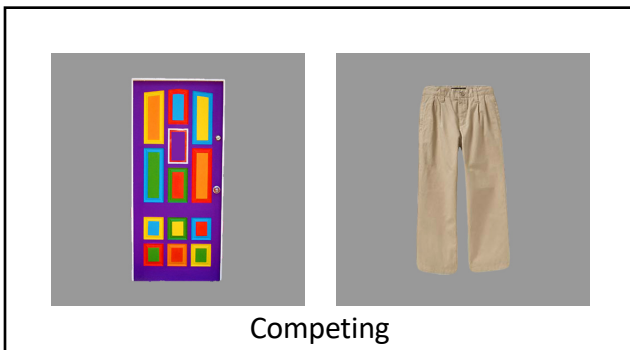

23

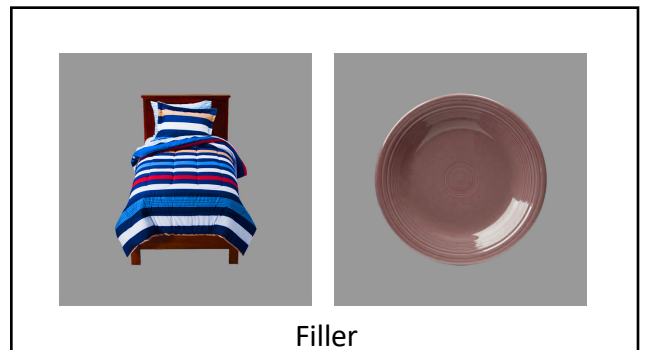

24

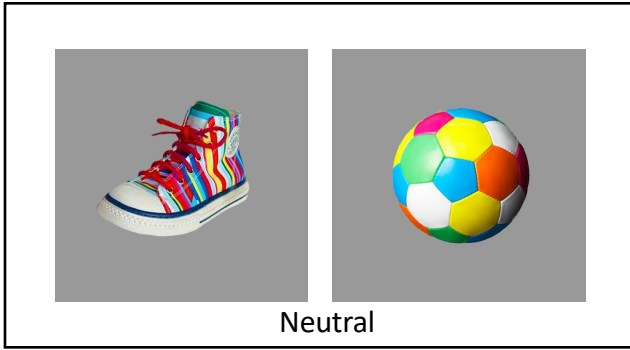

25

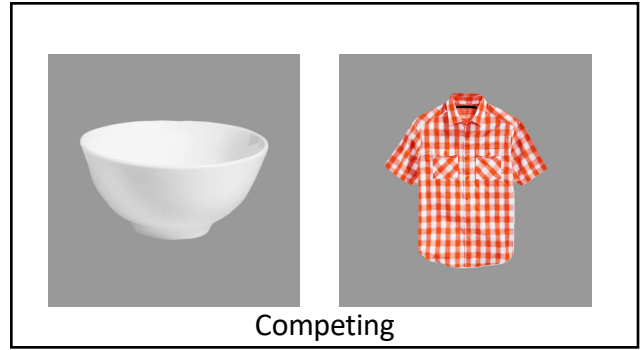

26

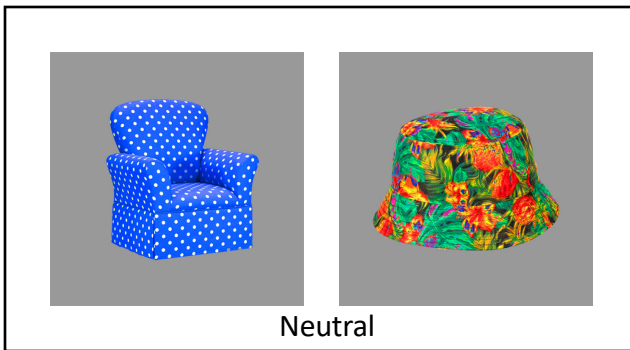

27

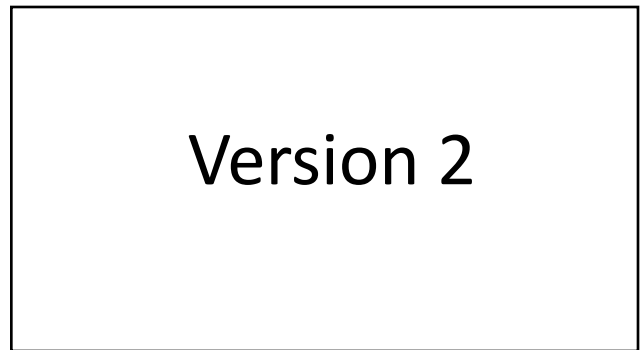

28

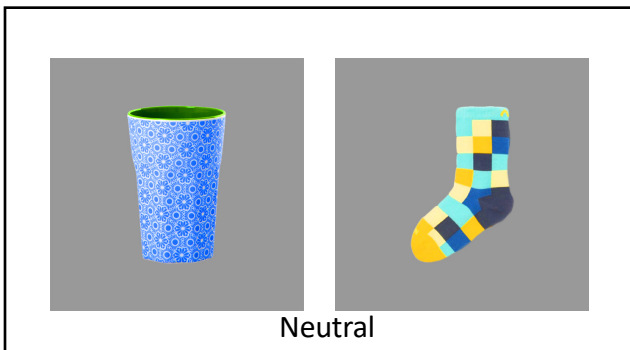

29

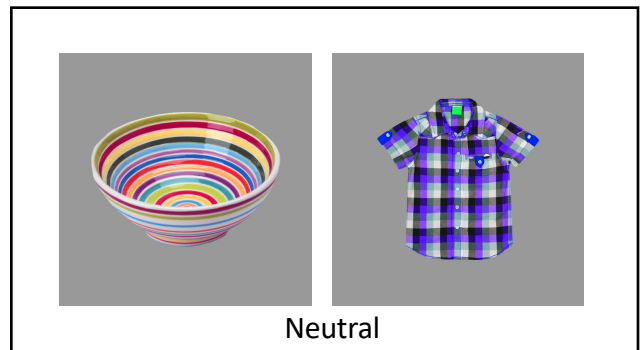

30

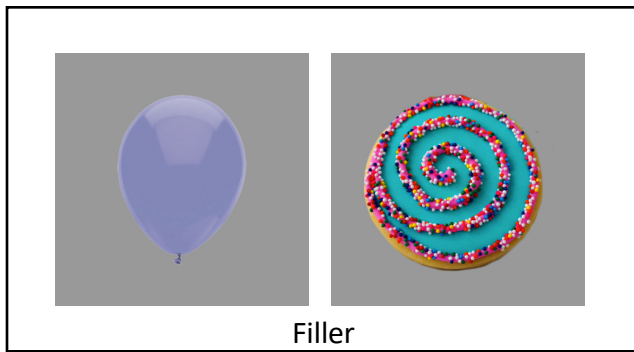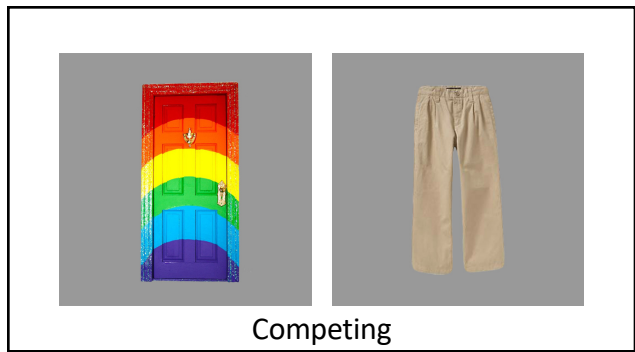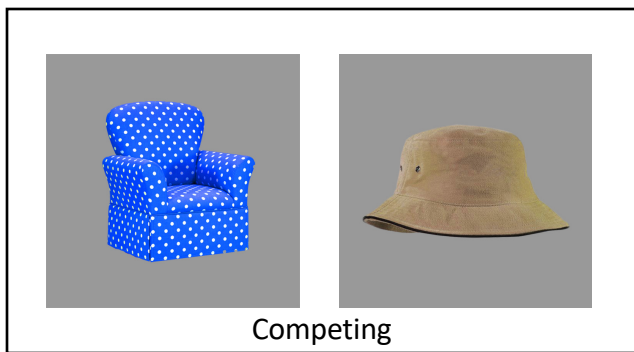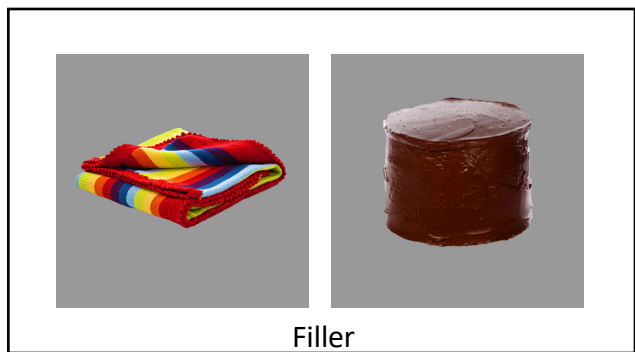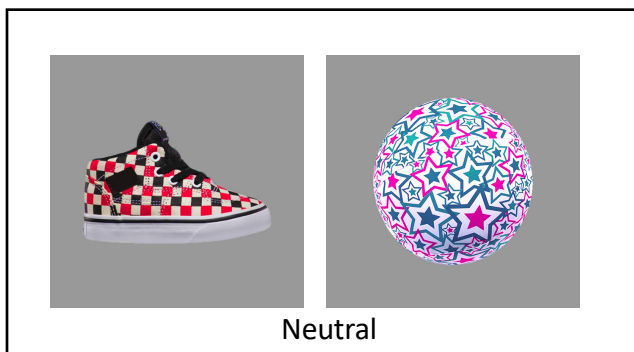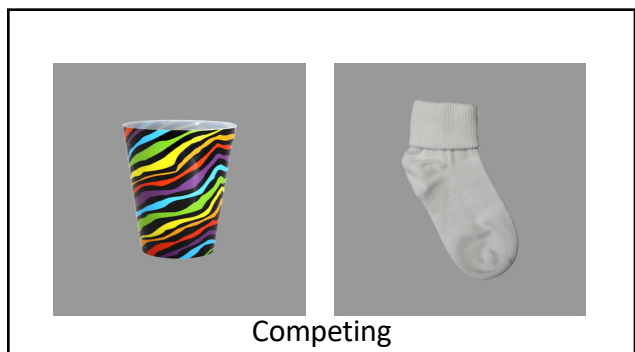

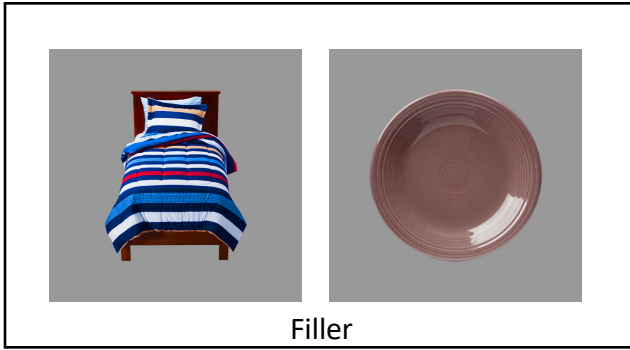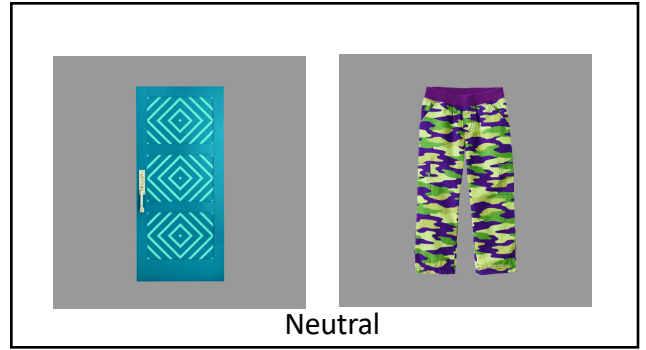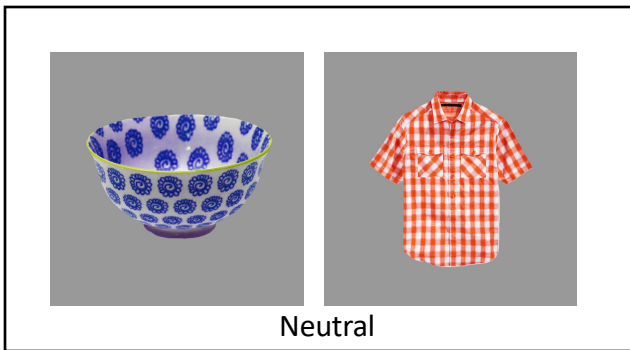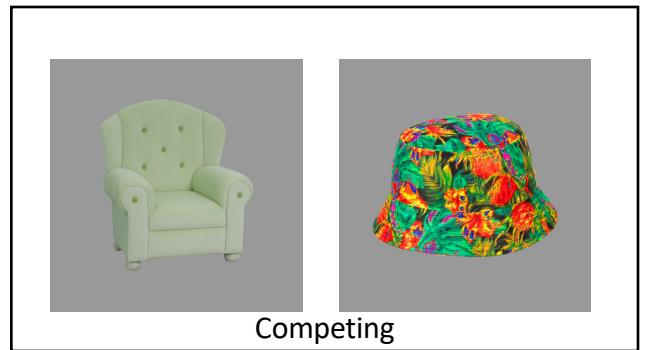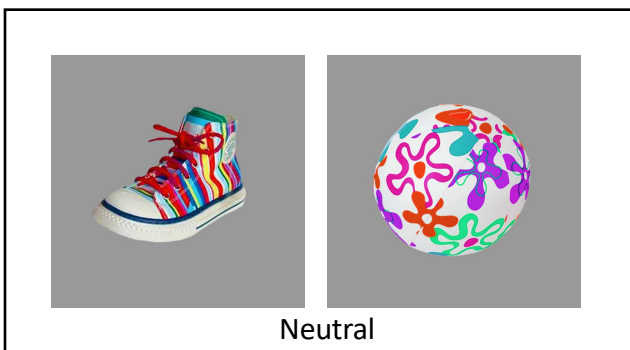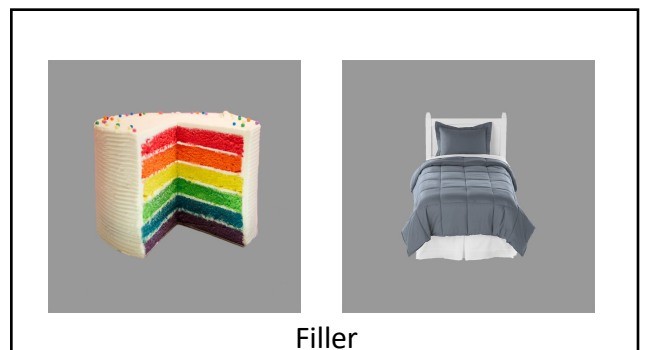

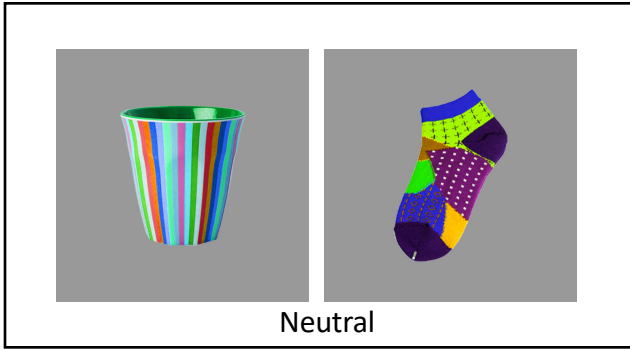

43

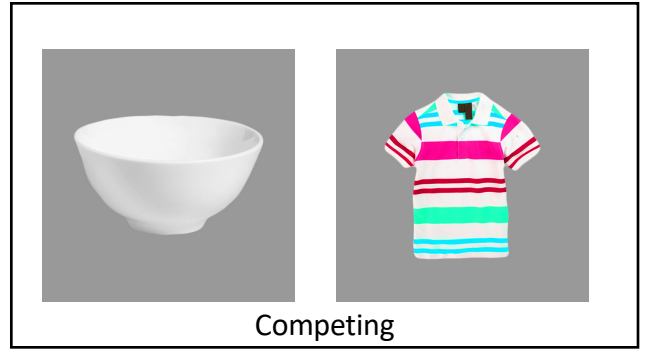

44

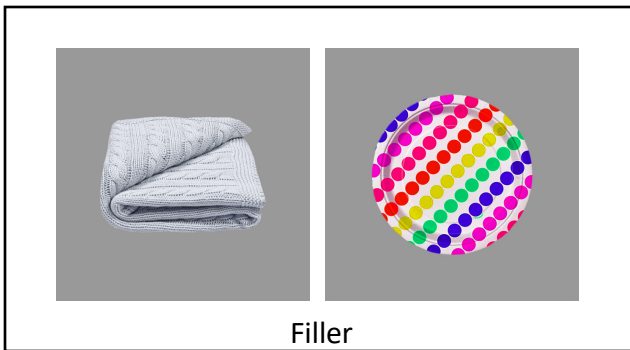

45

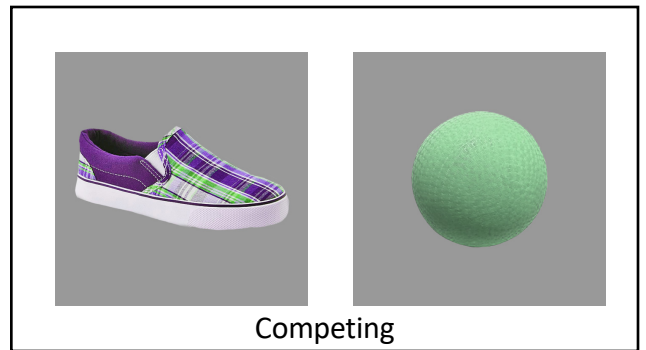

46

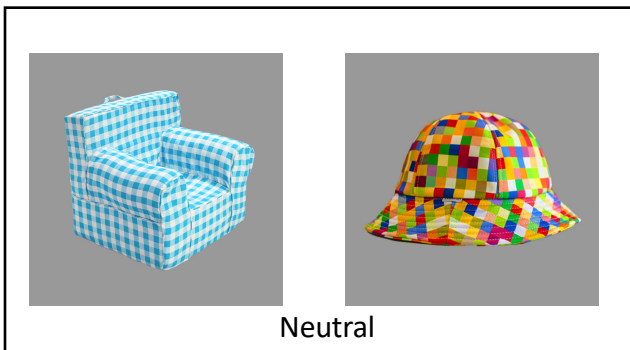

47

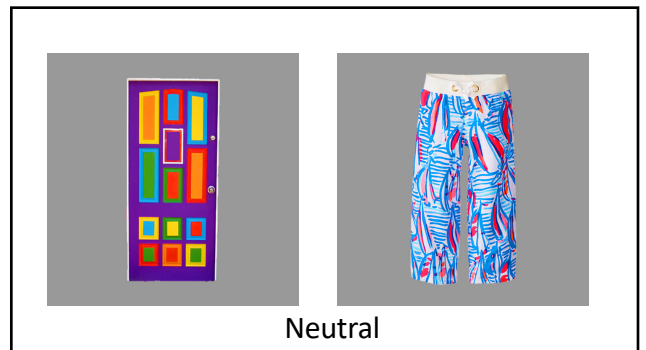

48



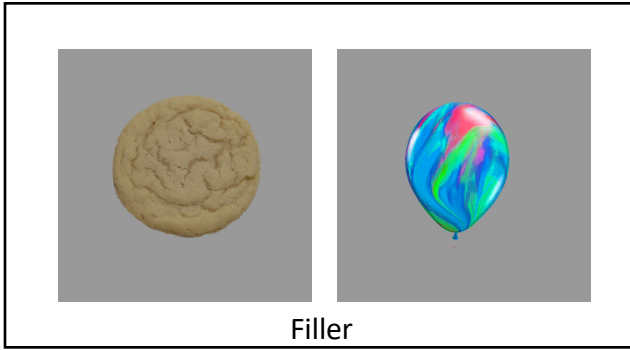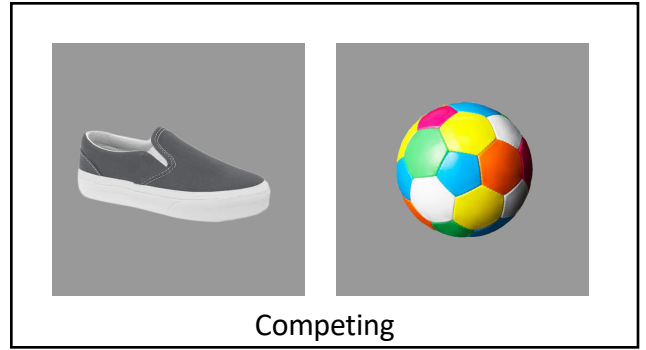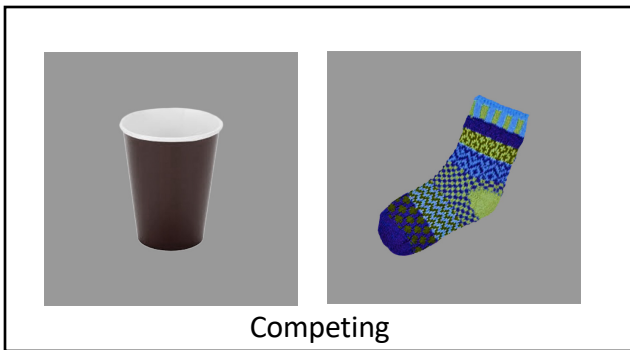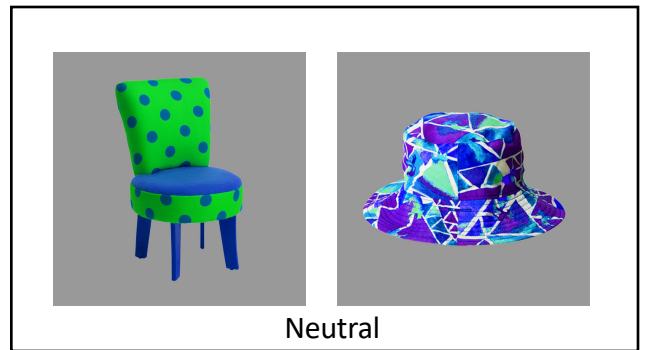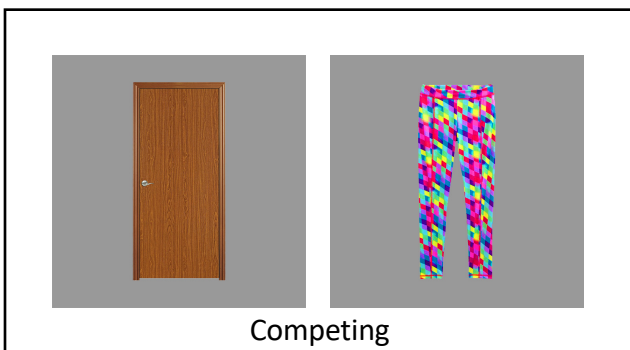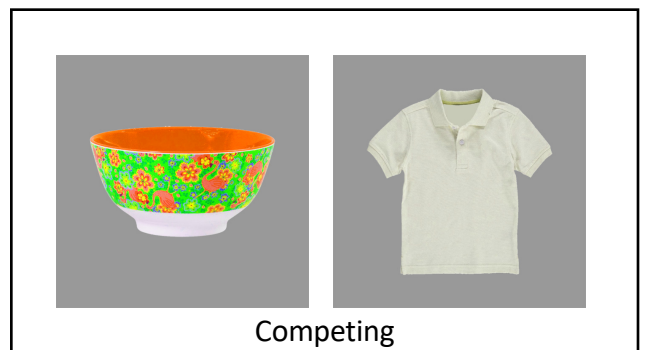

Supplement: NIHMS1695914-supplement-Appendix_A.pdf [file NIHMS1695914-supplement-Appendix_A.pdf]
